# Supplementary material for: A Comparison of Two Nights of Ambulatory Sleep Testing in Arrhythmia Patients
Source: Hindawi journal article supplement (doi:10.1155/2018/2394146), 2018-06-03
Supplement: f1 [file 2394146.f1.pdf]

**Supplementary table 1: Sleep macro-architecture for the study sample during second night of ambulatory recording.**

|                                            | <b>Total</b><br>(N=87)  | <b>OSA</b><br>(N=73)    | <b>Non-OSA</b><br>(n=14) | <b>Difference</b><br>(Sig) |
|--------------------------------------------|-------------------------|-------------------------|--------------------------|----------------------------|
| <b>Sleep Onset Latency</b><br><b>(min)</b> | 30.8 ± 27.85            | 37.52 ± 28.12           | 41 ± 27.23               | P=0.4                      |
| <b>Sleep Efficiency (%)</b>                | 72.10 ± 15.84           | 70.88 ± 16.26           | 78.49 ± 11.98            | P= 0.1                     |
| <b>Stage 1 (%)</b>                         | 5.82 ± 7.68             | 6.15 ± 8.16             | 4.12 ± 4.18              | P=0.3                      |
| <b>Stage 2 (%)</b>                         | 57.53 ± 17.31           | 58.39 ± 17.80           | 53 ± 14.1                | P=0.2                      |
| <b>Stage 3 (%)</b>                         | 12.79 ± 12.61           | 12.46 ± 13              | 14.48 ± 10.54            | P=0.2                      |
| <b>Stage 4 (%)</b>                         | 3.34 ± 7.05             | 1.95 ± 4.18             | 9.84 ± 12.64             | P=0.07                     |
| <b>REM (%)</b>                             | 17.12 ± 8.91            | 16.78 ± 9.17            | 18.87 ± 7.43             | P=0.7                      |
| <b>REM Latency (min)</b>                   | 92.46 ± 80.90<br>(n=86) | 89.62 ± 80.76<br>(n=72) | 107 ± 83<br>(n=14)       | P=0.5                      |

**Values are expressed as mean ± SD. Non-parametric test was used to compare means of groups. \*indicates significance. N=number; OSA: obstructive sleep apnea; REM: rapid eye movement.**

**Supplementary table 2: Respiratory parameters for the study sample during second night of ambulatory sleep testing.**

|                                         | <b>Total<br/>(n=87)</b> | <b>OSA<br/>(n=73)</b> | <b>Non-OSA<br/>(n=14)</b> | <b>Difference</b> |
|-----------------------------------------|-------------------------|-----------------------|---------------------------|-------------------|
| <b>AHI/h</b>                            | 20.26 ± 17.23           | 23.88 ± 16.54         | 1.66 ± 1.63               | P=0.000*          |
| <b>Supine AHI/h</b>                     | 23.29 ± 24.65           | 27.43 ± 24.90         | 1.99 ± 2                  | P=0.000*          |
| <b>Non-supine AHI/h</b>                 | 14.86 ± 18.34           | 17.59 ± 18.87         | 0.83 ± 1.1                | P=0.000*          |
| <b>REM AHI/h</b>                        | 23.34 ± 23.54           | 27.22 ± 23.83         | 3.37 ± 2.68               | P=0.000*          |
| <b>NREM-AHI/h</b>                       | 19 ± 17.5               | 22.44 ± 17.12         | 1.41 ± 2.06               | P=0.000*          |
| <b>Minimum Saturation (%)</b>           | 83.24 ± 8.45            | 82.23 ± 8.50          | 88.15 ± 3.3               | P=0.001*          |
| <b>Average nocturnal heart rate bpm</b> | 62.26 ± 14.3            | 63 ± 14.85            | 58.28 ± 10.58             | P=0.1             |
| <b>Arousal Index/h</b>                  | 14.81 ± 7.90            | 15.89 ± 7.97          | 9.2 ± 4.55                | P=0.002*          |
| <b>PLMS (count)</b>                     | 49.82 ± 99.83           | 58.16 ± 106.87        | 6.35 ± 15.73              | P=0.02*           |
| <b>PLMS Index/h</b>                     | 9.71 ± 18.47            | 11.33 ± 19.73         | 1.28 ± 3.31               | P=0.01*           |

**Values are expressed as mean ± SD. Non-parametric Mann Whitney test was used to compare means of groups. \*indicates significance. AHI: apnea-hypopnea-index; N=number; OSA: obstructive sleep apnea; REM: rapid eye movement; h: hour; bpm: beat per minute; PLMS: periodic limb movements in sleep.**
